# Supplementary material
Source: PubMed Central journal article supplement (PMC6544826)
Supplement: AEM.00059-19-s0001.pdf [file AEM.00059-19-s0001.pdf]

## Supplementary Materials and Methods

### Pancreatic histological evaluation

Pancreatic histological changes were evaluated according to the Schmidt's standard (Schmidt J et al., Ann Surg 215:44-56, 1992) as follows (Table S1). The total histopathological score of the pancreas included scores of edema, acinar necrosis, hemorrhage and inflammatory infiltrate.

**Table S1.** Histopathologic Scoring Criteria

| Edema                   |                                                                               |
|-------------------------|-------------------------------------------------------------------------------|
| 0                       | Absent                                                                        |
| 0.5                     | Focal expansion of interlobar septae                                          |
| 1                       | Diffuse expansion of interlobar septae                                        |
| 1.5                     | Same as 1 + focal expansion of interlobular septae                            |
| 2                       | Same as 1 + diffuse expansion of interlobular septae                          |
| 2.5                     | Same as 2 + focal expansion of interacinar septae                             |
| 3                       | Same as 2 + diffuse expansion of interacinar septae                           |
| 3.5                     | Same as 3 + focal expansion of intercellular spaces                           |
| 4                       | Same as 3 + diffuse expansion of intercellular spaces                         |
| Acinar necrosis         |                                                                               |
| 0                       | Absent                                                                        |
| 0.5                     | Focal occurrence of 1 - 4 necrotic cells/HPF                                  |
| 1                       | Diffuse occurrence of 1 - 4 necrotic cells/HPF                                |
| 1.5                     | Same as 1 + focal occurrence of 5 - 10 necrotic cells/HPF                     |
| 2                       | Diffuse occurrence of 5 - 10 necrotic cells/HPF                               |
| 2.5                     | Same as 2 + focal occurrence of 11 - 16 necrotic cells/HPF                    |
| 3                       | Diffuse occurrence of 11 - 16 necrotic cells/HPF (foci of confluent necrosis) |
| 3.5                     | Same as 3 + focal occurrence of >16 necrotic cells/HPF                        |
| 4                       | >16 necrotic cells/HPF (Extensive confluent necrosis)                         |
| Hemorrhage              |                                                                               |
| 0                       | Absent                                                                        |
| 0.5                     | 1 focus                                                                       |
| 1                       | 2 foci                                                                        |
| 1.5                     | 3 foci                                                                        |
| 2                       | 4 foci                                                                        |
| 2.5                     | 5 foci                                                                        |
| 3                       | 6 foci                                                                        |
| 3.5                     | 7 foci                                                                        |
| 4                       | ≥ 8 foci                                                                      |
| Inflammatory infiltrate |                                                                               |
| 0                       | 0 - 1 intralobular or perivascular leukocytes/HPF                             |
| 0.5                     | 2 - 5 intralobular or perivascular leukocytes/HPF                             |
| 1                       | 6 - 10 intralobular or perivascular leukocytes/HPF                            |
| 1.5                     | 11 - 15 intralobular or perivascular leukocytes/HPF                           |

---

|     |                                                     |
|-----|-----------------------------------------------------|
| 2   | 16 - 20 intralobular or perivascular leukocytes/HPF |
| 2.5 | 21 - 25 intralobular or perivascular leukocytes/HPF |
| 3   | 26 - 30 intralobular or perivascular leukocytes/HPF |
| 3.5 | > 30 leukocytes/HPF or focal microabscesses         |
| 4   | > 35 leukocytes/HPF or confluent microabscesses     |

---

HPF represents “ high-power field ”.

### **Immunohistochemistry**

Ileal paraffin sections were subjected to deparaffinization, rehydration and heat-mediated antigen retrieval using citrate buffer. Endogenous peroxidase activity was blocked by 3% H<sub>2</sub>O<sub>2</sub>. After incubation with goat serum, the sections were then incubated with primary antibodies against TLR4 (1:150, ABclonal, Wuhan, Hubei, China), p-IRE1 $\alpha$  (1:150, Cell Signalling Technology, Denver, MA, USA), p-eIF2 $\alpha$  (1:150, ABclonal), ATF6 (1:150, ABclonal) overnight at 4 °C. After washing three times with PBS, the sections were incubated with horseradish peroxidase (HRP)-conjugated secondary antibody for 30 minutes at room temperature. Finally, diaminobenzidine (DAB) was added for visualization.

### **Fecal DNA extraction**

Bacterial DNA was extracted from fecal samples with the E.Z.N.A. Soil DNA Kit (Omega Bio-Tek, Norcross, GA, USA) according to the manufacturer's protocols (<https://www.omegabiotek.com/product/e-z-n-a-soil-dna-kit/>).

- (1) Add 200 mg feces sample to a Disruptor Tube.
- (2) Add 725  $\mu$ l SLX-Mlus Buffer. Vortex at maximum speed for 3-5 minutes to lyse samples.
- (3) Centrifuge at 500 g for 5 seconds to remove drops of liquid from the lid.
- (4) Add 72  $\mu$ l DS Buffer. Vortex to mix thoroughly.
- (5) Incubate at 70 °C for 10 minutes. Briefly vortex the tube once during incubation.
- (6) Centrifuge at 10,000 g for 5 minutes at room temperature.
- (7) Transfer 400  $\mu$ l supernatant into a new 1.5 mL microcentrifuge tube.
- (8) Add 135  $\mu$ l chilled P2 Buffer. Vortex to mix thoroughly.
- (9) Let sit on ice for 3 minutes.
- (10) Centrifuge at maximum speed ( $\geq$  13,000 g) for 1 minute.
- (11) Carefully transfer the supernatant to a new 1.5 mL microcentrifuge tube.
- (12) Add 200  $\mu$ l cHTR Reagent. Vortex to mix thoroughly.
- (13) Let sit at room temperature for 2 minutes.
- (14) Centrifuge at maximum speed for 1 minute.
- (15) Transfer cleared supernatant (~ 500  $\mu$ l) to a new 1.5 mL microcentrifuge tube.
- (16) Add an equal volume XP1 Buffer. Vortex to mix thoroughly.
- (17) Insert a HiBind DNA Mini Column into a 2 mL Collection Tube.
- (18) Transfer up to 700  $\mu$ l sample from Step 16 to the HiBind DNA Mini Column.
- (19) Centrifuge at 10,000 g for 1 minute at room temperature.
- (20) Discard the filtrate and reuse the Collection Tube.
- (21) Repeat Steps 18-20 until all the lysate from Step 16 has passed through the

HiBind DNA Mini Column.

- (22) Add 500  $\mu$ l HBC Buffer.
- (23) Centrifuge at 10,000 g for 1 minute.
- (24) Discard the filtrate and reuse the Collection Tube.
- (25) Transfer the HiBind DNA Mini Column into a new 2 mL Collection Tube.
- (26) Add 700  $\mu$ l DNA Wash Buffer.
- (27) Centrifuge at 10,000 g for 1 minute.
- (28) Discard the filtrate and reuse the Collection Tube.
- (29) Repeat Steps 26-28 for a second DNA Wash Buffer wash step.
- (30) Centrifuge the empty HiBind DNA Mini Column at maximum speed for 2 minutes at room temperature.
- (31) Transfer the HiBind DNA Mini Column into a new 1.5 mL microcentrifuge tube.
- (32) Add 50-100  $\mu$ l Elution Buffer heated to 70  $^{\circ}$ C directly onto the center of HiBind matrix.
- (33) Let sit at room temperature for 1-2 minutes.
- (34) Centrifuge at maximum speed for 1 minute.
- (35) Take the filtrate from Step 34 and place onto the center of the same HiBind DNA Mini Column used in the procedure.
- (36) Let sit at room temperature for 1 minute.
- (37) Centrifuge at maximum speed for 1 minute.
- (38) Store eluted DNA at -20  $^{\circ}$ C for future use.

## Supplementary Figures

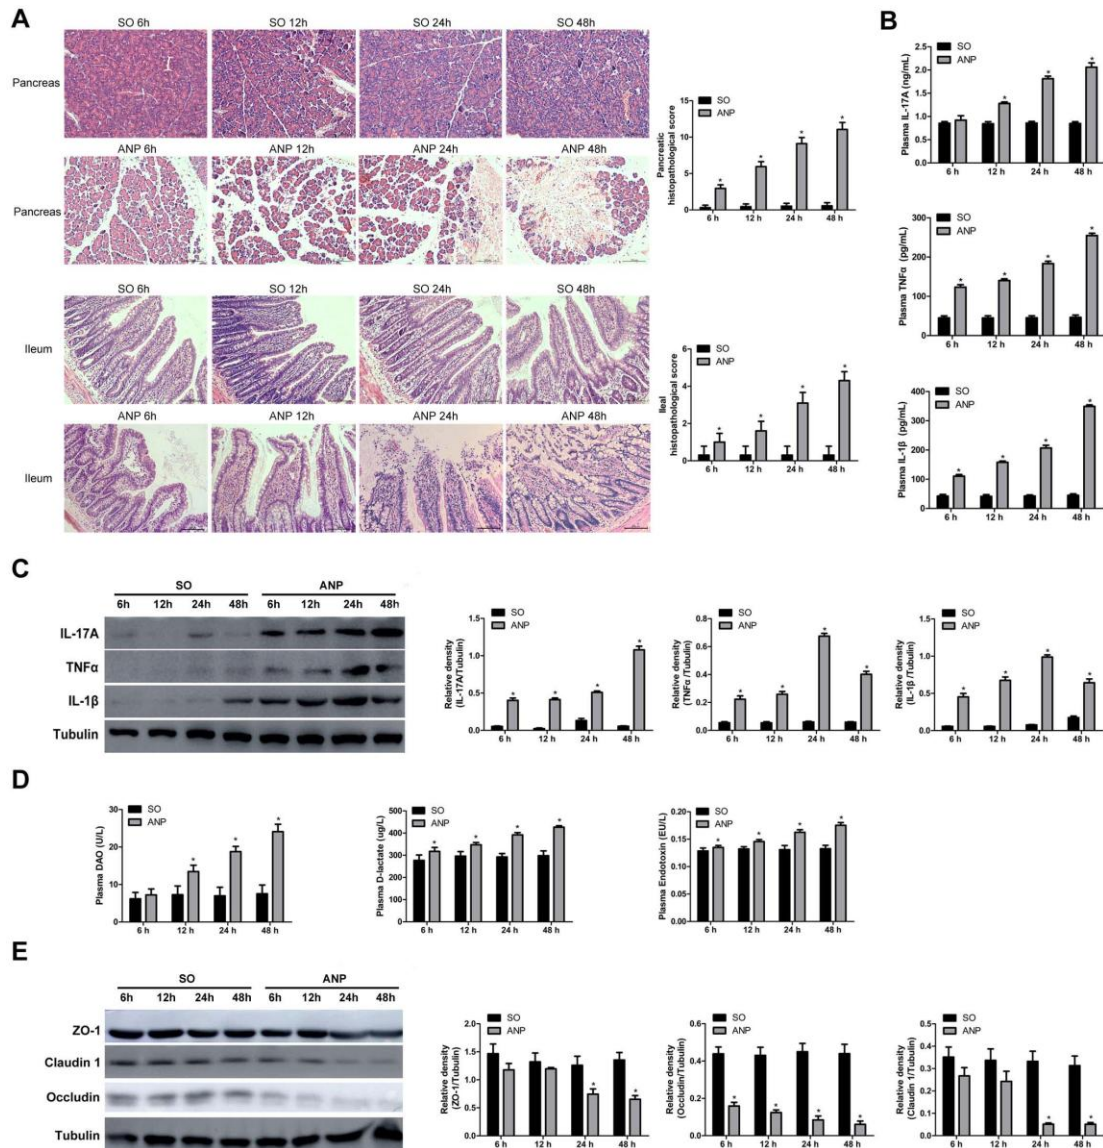

**Figure S1.** ANP induced pancreatic and intestinal injury in conventional rats. (A) Histological analysis of the pancreas and ileum (HE,  $\times 200$ ). (B) IL-17A, TNF $\alpha$  and IL-1 $\beta$  levels in the plasma by ELISA. (C) IL-17A, TNF $\alpha$  and IL-1 $\beta$  expression in the ileum by Western Blot. (D) DAO, D-lactate and endotoxin levels in the plasma. (E) ZO-1, claudin 1 and occludin expression in the ileum by Western Blot at 6, 12, 24 and 48 h after ANP induction in conventional rats.  $n = 10$  per group. Three independent experiments were performed. Comparison between two groups (SO vs. ANP at the same timepoint) was performed by Student's  $t$ -test.  $*P < 0.05$  vs. SO group. SO represents sham-operated.

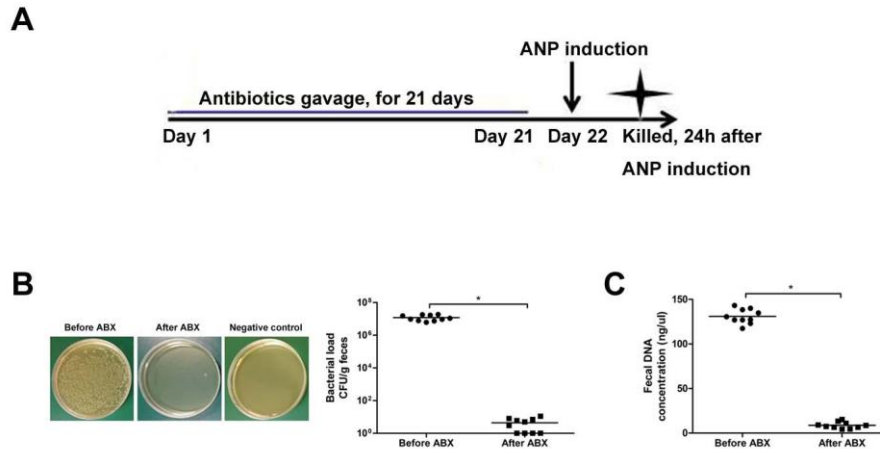

**Figure S2.** Gut microbiota-depleted rats were obtained by using a cocktail of antibiotics (ABX). (A) The time axis of antibiotic treatment and ANP induction. (B) Bacterial quantity by fecal cultivation. (C) Fecal bacterial DNA concentration before and after ABX treatment.  $n = 10$  per group. Three independent experiments were performed. Comparison between two groups (Before ABX vs. After ABX) was performed by Student's  $t$ -test.  $*P < 0.05$ .

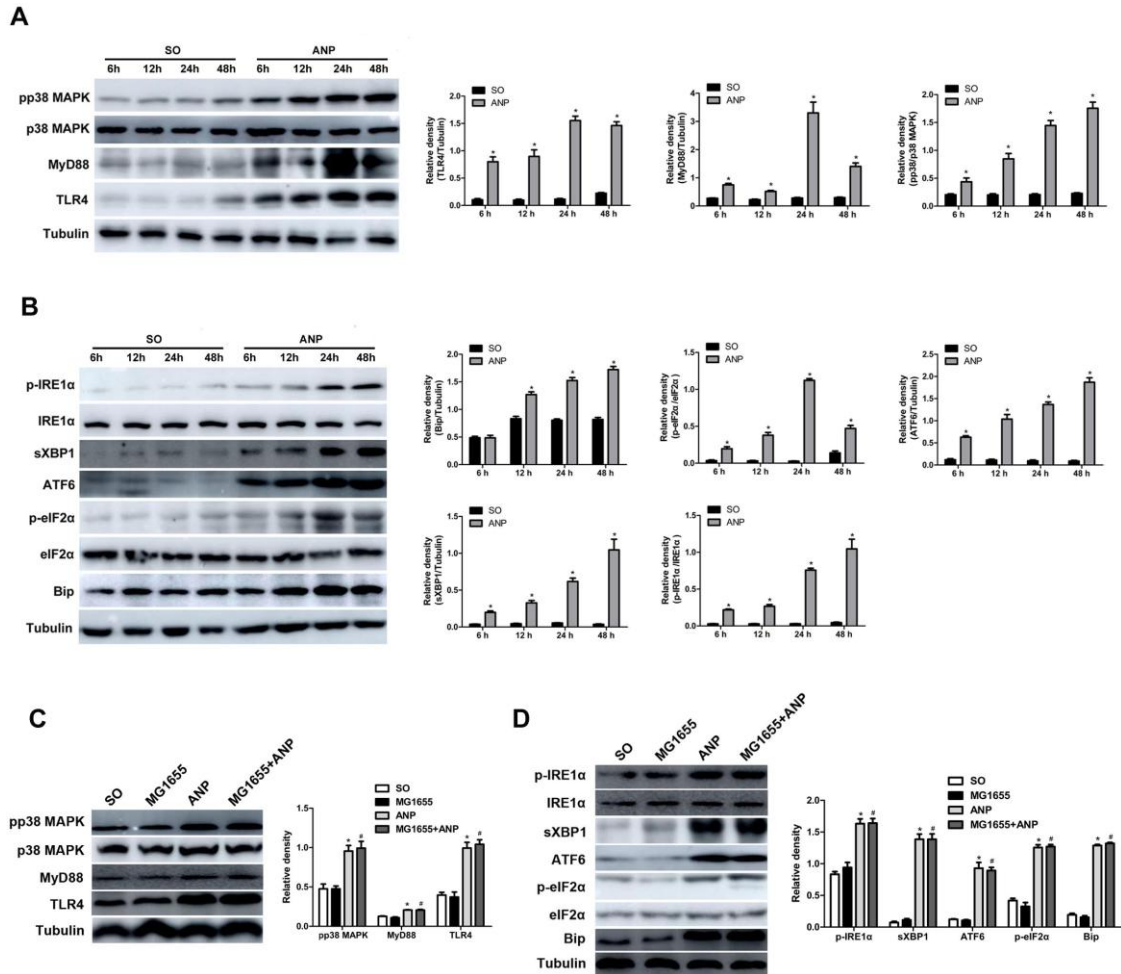

**Figure S3.** ANP induced TLR4 and ERS signalling in the ileum in conventional rats. (A-B) TLR4 (A) and ERS (B) signalling molecules expression in the ileum by Western Blot at 6, 12, 24 and 48 h after ANP induction in conventional rats. (C-D) Comparison of TLR4 (C) and ERS (D) signalling molecules after ANP induction between conventional rats and *E. coli* MG1655-gavaged conventional rats.  $n = 10$  per group. Three independent experiments were performed. Data were analyzed by Student's *t*-test for two groups and one-way ANOVA followed by Bonferroni's *post* test for three or more groups. \* $P < 0.05$  vs. SO group, # $P < 0.05$  vs. MG1655 group. SO represents sham-operated.

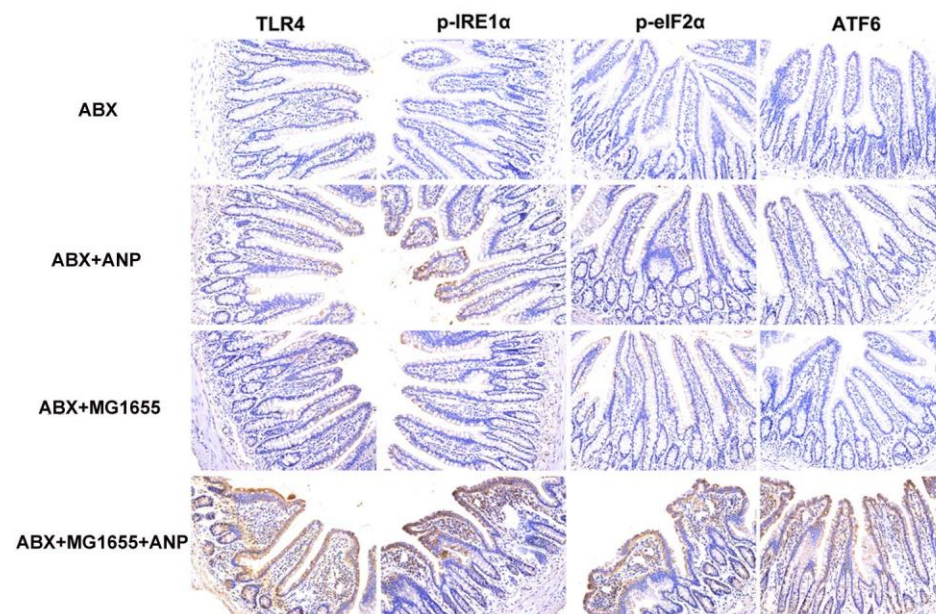

**Figure S4.** Immunohistochemistry analysis of TLR4, p-IRE1 $\alpha$ , p-eIF2 $\alpha$ , ATF6 in the ileum after ANP induction in *E. coli* MG1655-monocolonized rats. n = 10 per group. Three independent experiments were performed.
